# Supplementary material for: Functional proteins in breast milk and their correlation with the development of the infant gut microbiota: a study of mother-infant pairs
Source: Frontiers journal article supplement (doi:10.3389/fmicb.2023.1239501), 2023-09-13
Supplement: Data_Sheet_1.PDF [file Data_Sheet_1.PDF]

SUPPLEMENTARY MATERIAL

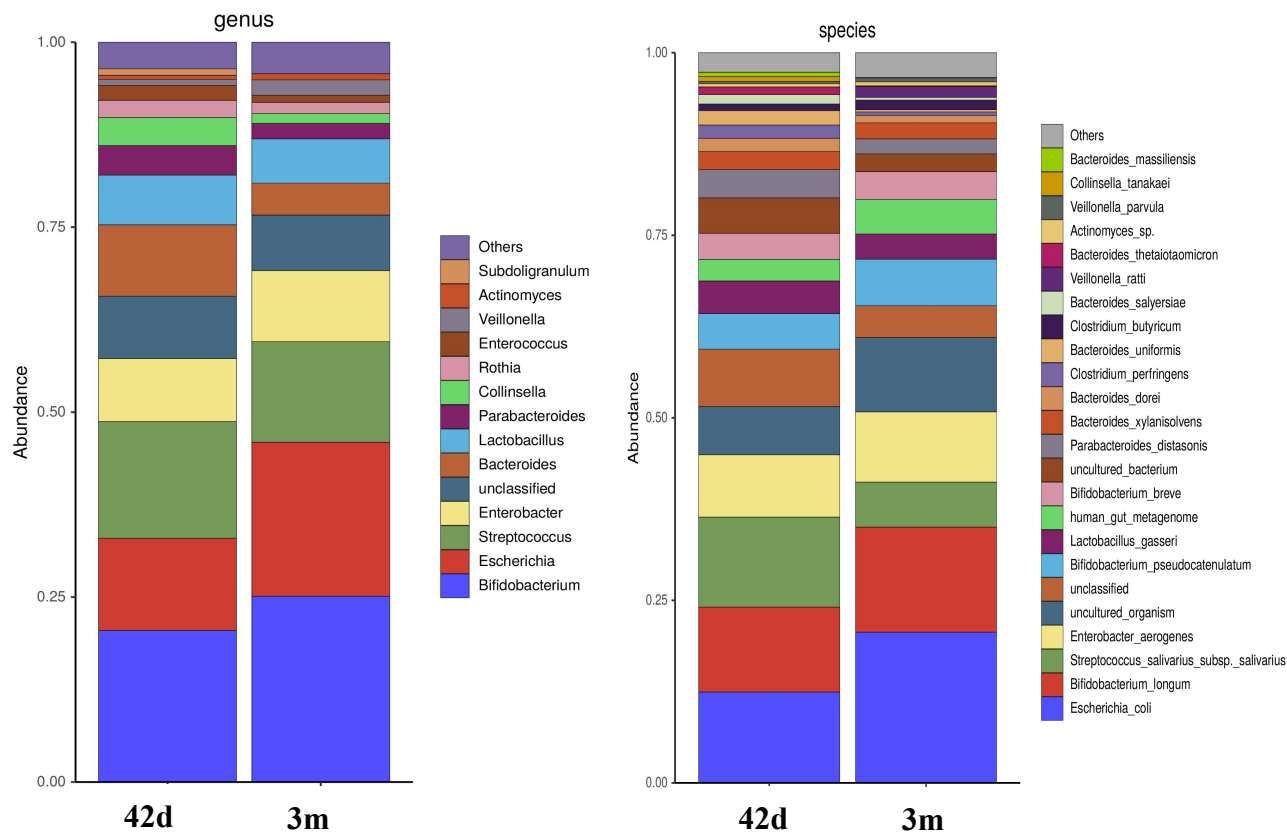

Figure S1 Histogram distribution of intestinal microflora at genus and species levels in infants on the 42 day and 3 months

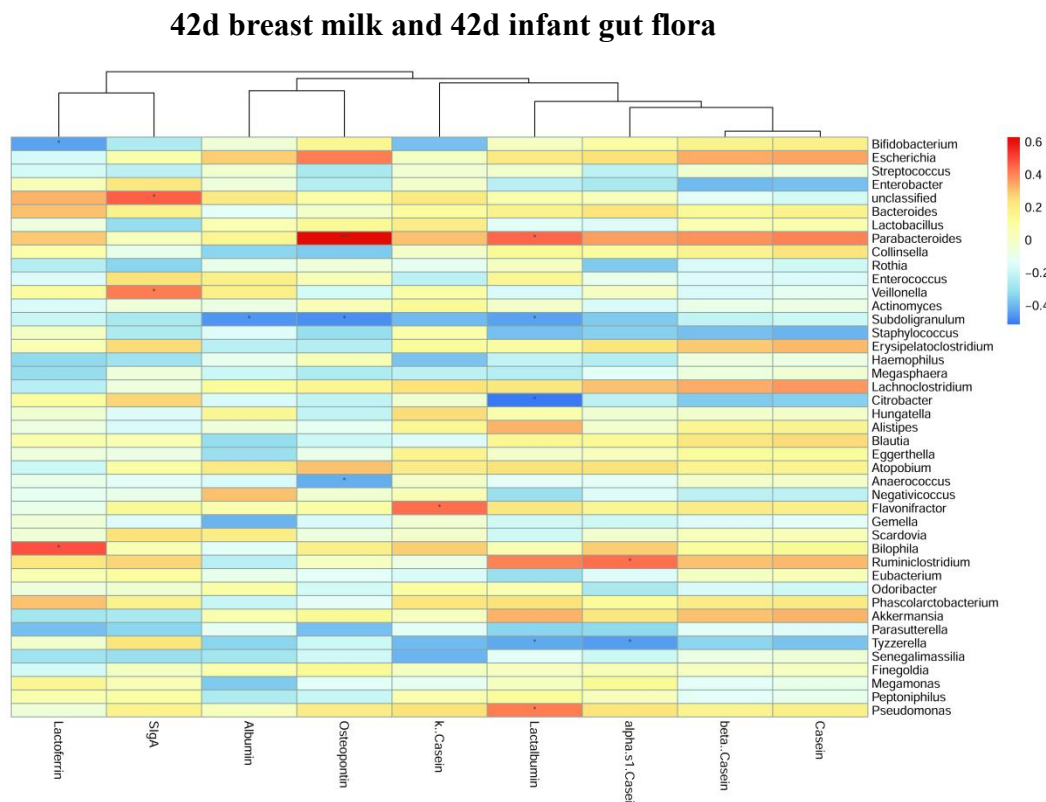

### 42d breast milk and 3m infant gut flora

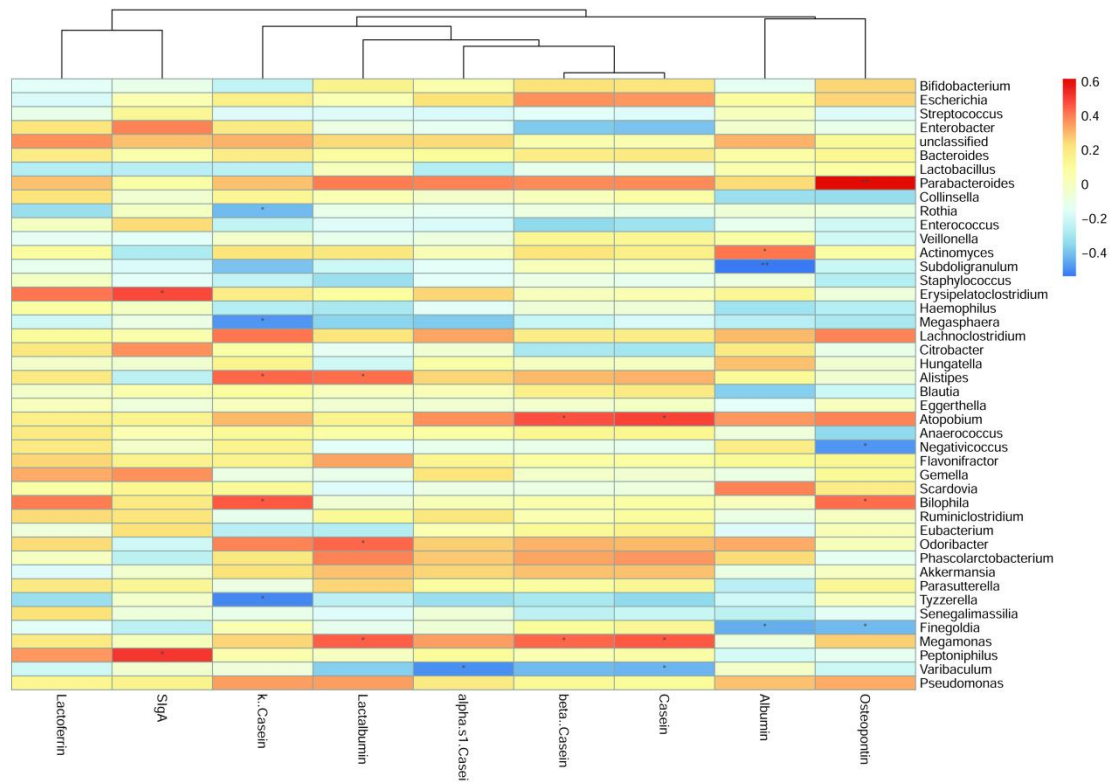

### 3m breast milk and 3m infant gut flora

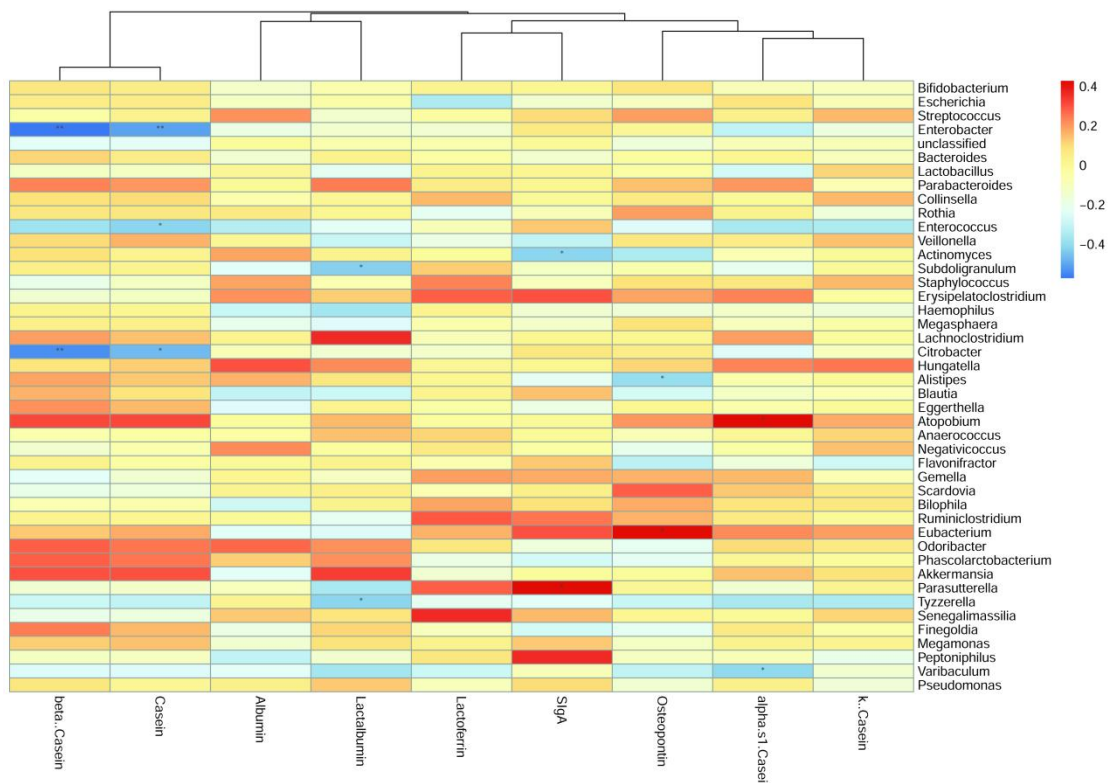

**Figure S2** Correlation heatmap of breast milk proteins with the top 40 most-abundant infant gut microbiota at the genus level based on Spearman analysis.

## 42d breast milk and 42d infant gut flora

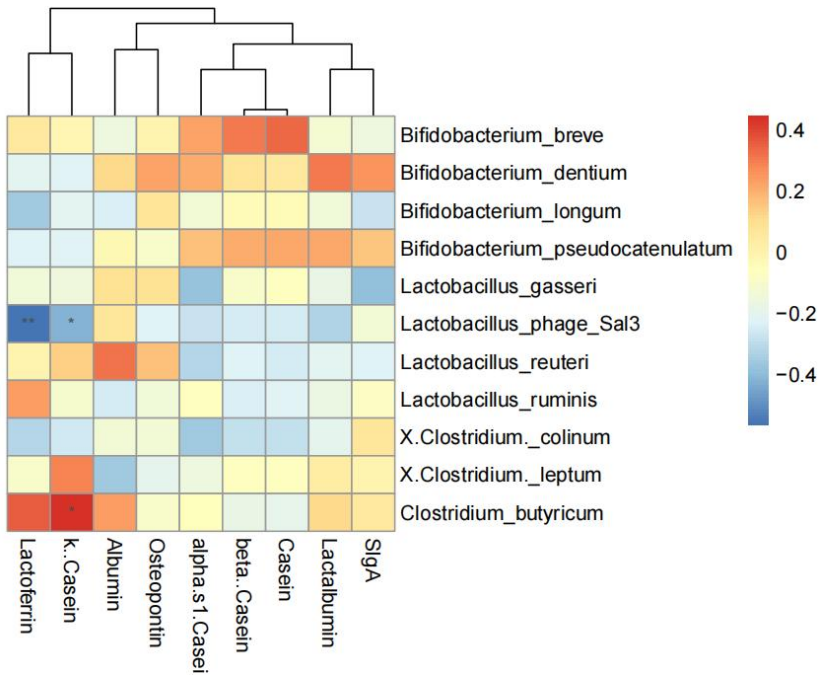

## 42d breast milk and 3m infant gut flora

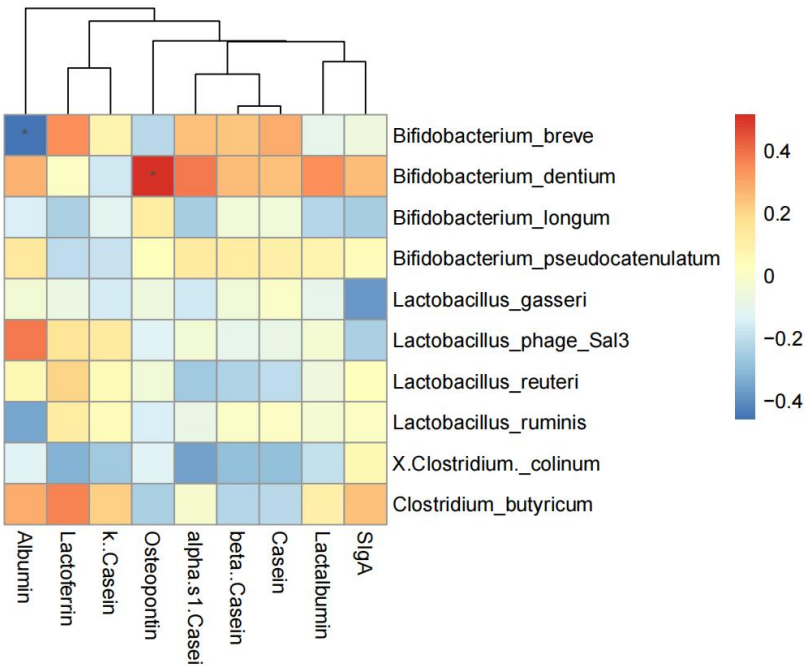

### 3m breast milk and 3m infant gut flora

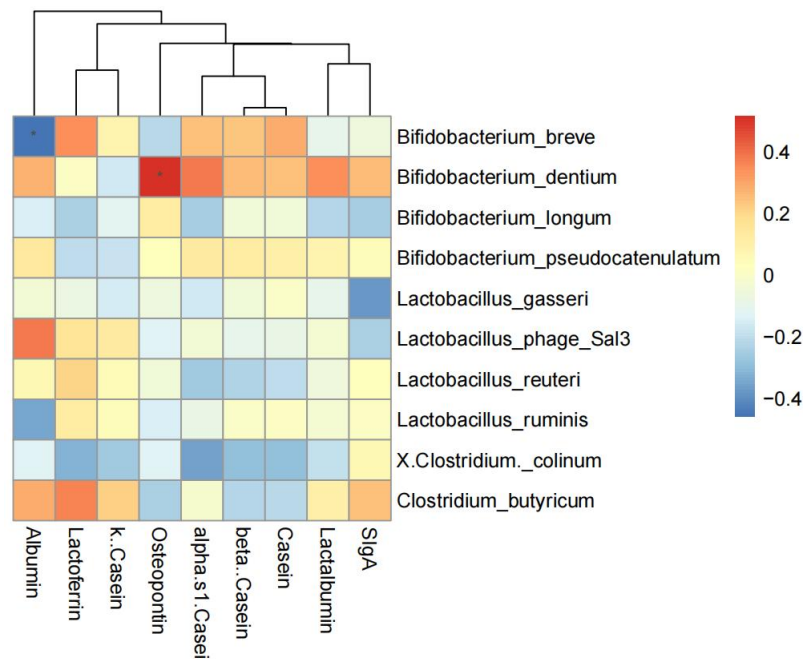

**Figure S3** Correlation heatmap of breast milk proteins with the *Bifidobacterium* and *Lactobacillus* of infant intestinal flora based on Spearman analysis.

### 42d breast milk and 42d infant gut flora

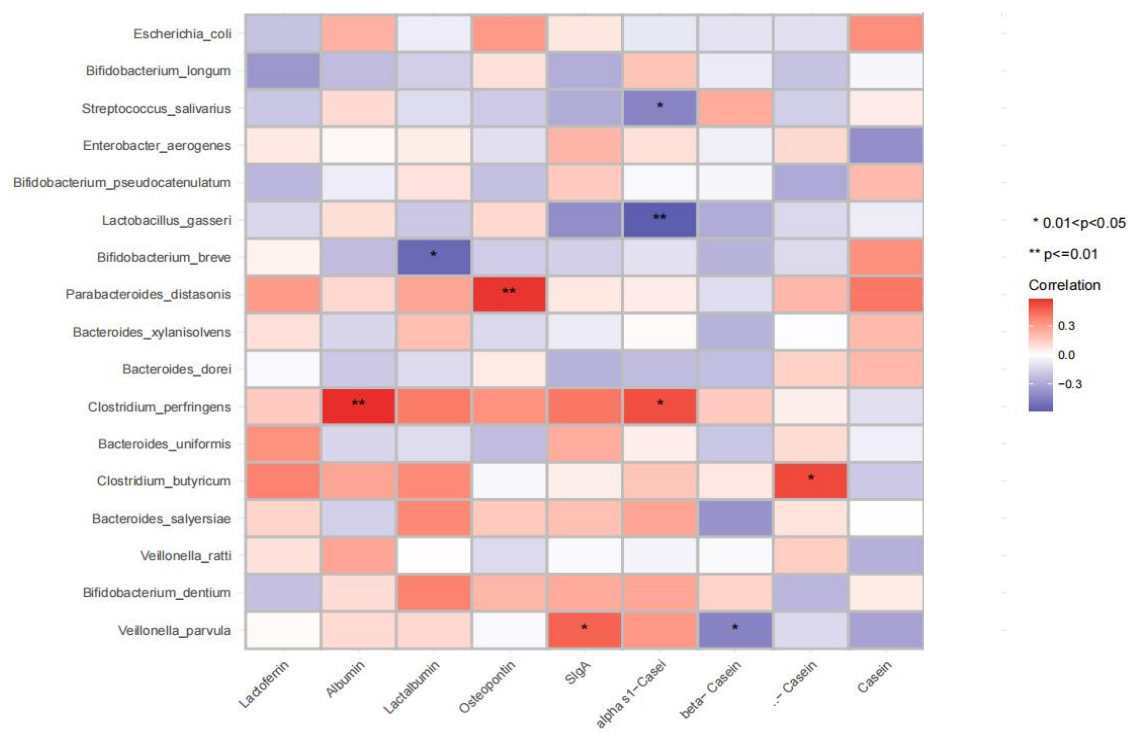

### 42d breast milk and 3m infant gut flora

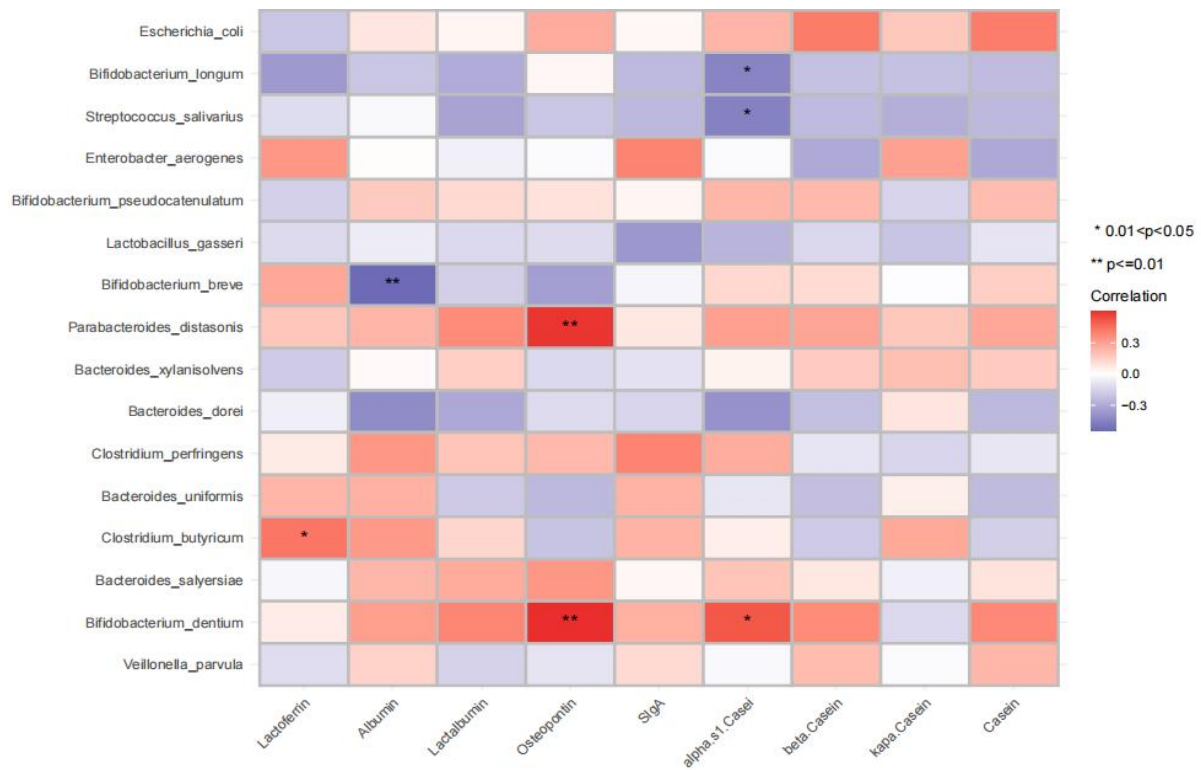

### 3m breast milk and 3m infant gut flora

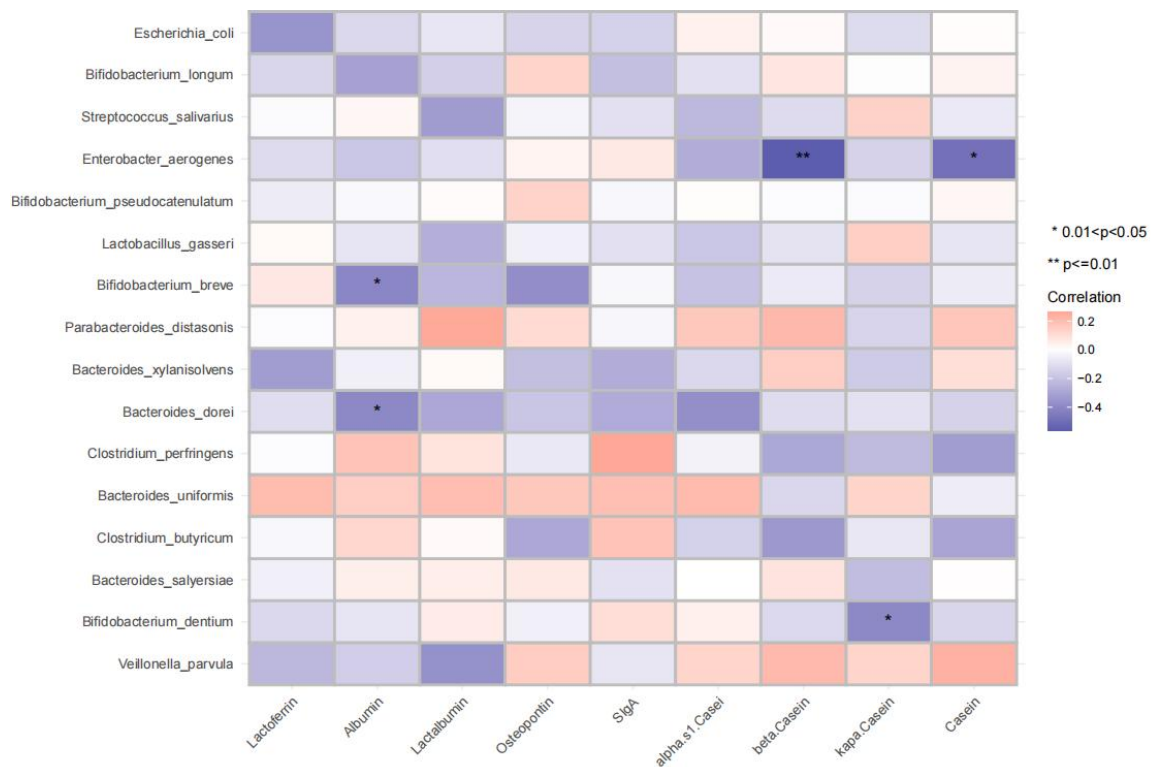

**Figure S4 Correlation heatmap of breast milk proteins with the top 40 most-abundant infant gut microbiota at the species level based on partial correlation analysis after controlling delivery mode**

**Table S1A.** Proteins content in breast milk with different delivery mode.

| Protein<br>(mg/100g) | 42d                 |                     | P-value* | 3m                  |                     | P-value* |
|----------------------|---------------------|---------------------|----------|---------------------|---------------------|----------|
|                      | Vaginal<br>delivery | Cesarean<br>section |          | Vaginal<br>delivery | Cesarean<br>section |          |
| Lactoferrin          | 105.5±33.7          | 88.0±22.8           | 0.16     | 82.3±30.0           | 64.8±12.0           | 0.24     |
| Albumin              | 29.1±6.1            | 26.8±5.8            | 0.31     | 25.2±6.1            | 22.8±5.35           | 0.68     |
| α- Lactalbumin       | 386.6±47.3          | 368.3±46.3          | 0.44     | 298.3±35.0          | 264.6±42.8          | 0.54     |
| Osteopontin          | 25.4±4.2            | 22.1±5.9            | 0.18     | 19.5±3.3            | 16.9±3.4            | 0.44     |
| SIgA                 | 37.9±14.3           | 40.0±12.1           | 0.90     | 34.8±14.5           | 31.8±10.3           | 0.76     |
| αs1-Casei            | 85.1±12.5           | 69.9±12.8           | 0.06     | 64.9±12.8           | 53.9±4.5            | 0.25     |
| β- Casein            | 411.7±88.6          | 351.8±52.2          | 0.12     | 352.1±87.8          | 296.1±36.3          | 0.33     |
| κ- Casein            | 32.3±6.3            | 29.5±5.3            | 0.30     | 25.1±4.5            | 21.2±4.8            | 0.35     |
| Casein               | 529.2±97.0          | 448.5±57.1          | 0.09     | 439.8±97.2          | 371.3±42.6          | 0.33     |

\*Continuous variables were presented as the Mean ± SD. Significant differences between groups were analyzed by Wilcox test.

**Table S1B.** Proteins content in breast milk with different postpartum weight retention.

| Protein (mg/100g) | 3m         |            |            | P-value* |
|-------------------|------------|------------|------------|----------|
|                   | <3         | 3-5        | >5         |          |
| Lactoferrin       | 81.8±33.0  | 67.5±32.5  | 77.9±19.7  | 0.52     |
| Albumin           | 27.3±8.7   | 21.8±4.7   | 23.9±3.1   | 0.31     |
| α- Lactalbumin    | 326.3±28.1 | 270.1±37.2 | 269.4±29.8 | 0.83     |
| Osteopontin       | 19.2±2.8   | 17.9±4.9   | 18.7±3.4   | 0.63     |
| SIgA              | 30.4±9.5   | 35.4±19.8  | 35.5±12.5  | 0.47     |
| αs1-Casei         | 66.5±6.8   | 61.7±13.4  | 57.8±13.6  | 0.38     |
| β- Casein         | 392.3±34.4 | 289.9±86.9 | 316.0±79.5 | 0.47     |
| κ- Casein         | 26.4±3.9   | 25.6±4.4   | 21.3±4.7   | 0.65     |
| Casein            | 479.0±45.1 | 377.3±89.7 | 395.1±95.2 | 0.43     |

\*Continuous variables were presented as the Mean ± SD. Significant differences between groups were analyzed by Wilcox test.
